# Supplementary material for: Methadone Requires the Co-Activation of μ-Opioid and Toll-Like-4 Receptors to Produce Extracellular DNA Traps in Bone-Marrow-Derived Mast Cells
Source: MDPI journal article supplement (doi:10.3390/ijms25042137), 2024-02-10
Supplement: s1 [file s1]

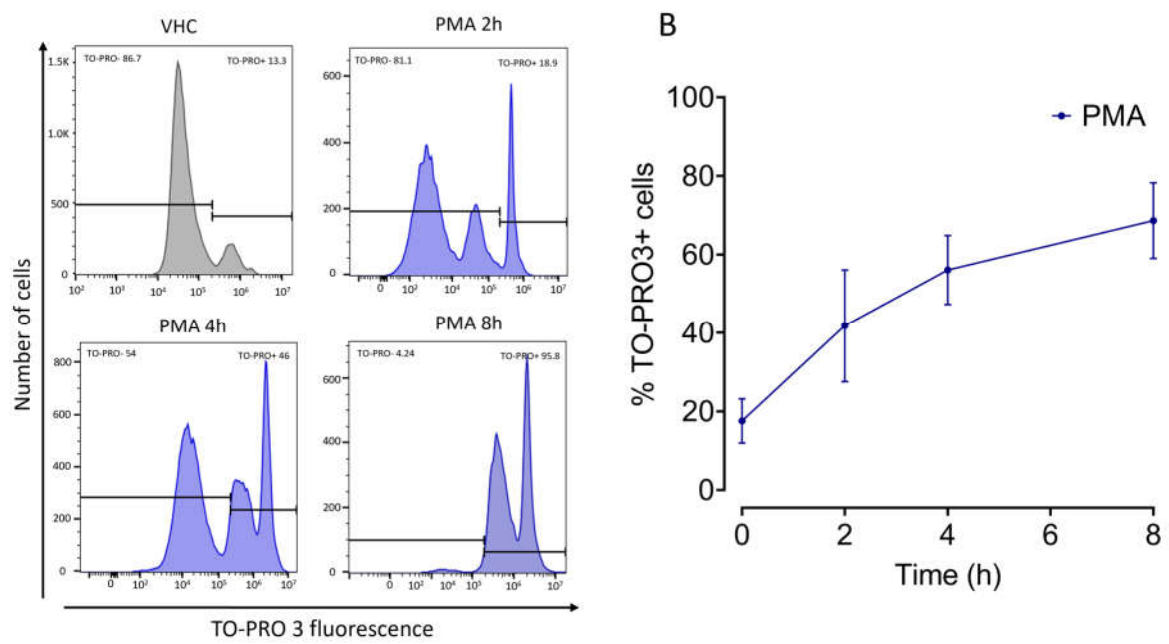

Figure S1. PMA induces BMMC death in a time-dependent manner.

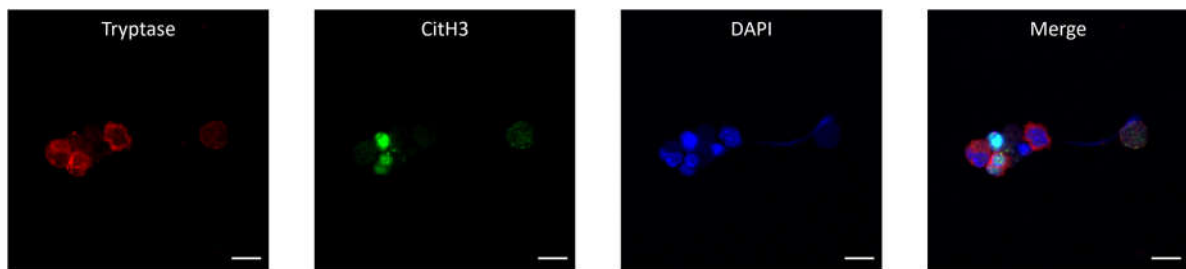

Figure S2. PMA-induced ETs contain Tryptase and CitH3.
